# Supplementary material
Source: publisher figshare collection journal article supplement (https://sage.figshare.com/ndownloader/files/17430398)
Supplement: Supplementary file 1 [file 17430398]

do	not	mod	neg
not	know	neg	v
know	where	v	adv:int
where	all	adv:int	qn
all	the	qn	det:art
the	block-PL	det:art	n
block-PL	have	n	v
have	go&PASTP	v	part
go&PASTP	now	part	adv
they	be&PRES	pro:sub	aux
be&PRES	somewhere	aux	adv
want	to	v	inf
to	build	inf	v
build	something	v	pro:indef
what	be&PRES	pro:int	aux
be&PRES	you	aux	pro:per
you	go-PRESP	pro:per	part
go-PRESP	to	part	inf
to	build	inf	v
do&PAST	you	v	pro:per
you	see	pro:per	v
see	Jeannine	v	n:prop
Jeannine	today	n:prop	adv:tem
yes		co
and	what	coord	pro:int
what	do&PAST	pro:int	mod
do&PAST	Jeannine	mod	n:prop
Jeannine	give	n:prop	v
give	you	v	pro:per
do&PAST	you	v	pro:per
you	get	pro:per	v
get	a	v	det:art
a	little	det:art	adj
little	present	adj	adv
present	from	adv	prep
from	Jeannine	prep	n:prop
what	be&PRES	pro:int	aux
be&PRES	you	aux	pro:per
you	make-PRESP	pro:per	part
you	building	pro:per	n
building	a	n	det:art
a	castle	det:art	n
what	be&3S	pro:int	aux
be&3S	it	aux	pro:per
red		adj
do&3S	that	mod	det:dem
that	go	det:dem	v
go	in	v	prep
in	there	prep	adv
wow		co
wow	whee	co	co
shall	I	mod	pro:sub
I	go	pro:sub	v
go	and	v	coord
and	see	coord	v
see	if	v	conj
if	I	conj	pro:sub
I	can	pro:sub	mod
can	find	mod	v
find	Jeannine	v	n:prop
Jeannine	s	n:prop	poss
s	present	poss	n
what	be&3S	pro:int	cop
be&3S	this	cop	pro:dem
this	Fraser	pro:dem	n:prop
a	frog	det:art	n
who	get&PAST	pro:rel	v
get&PAST	you	v	pro:per
you	that	pro:per	pro:dem
I	know	pro:sub	v
who	get&PAST	pro:rel	v
get&PAST	you	v	pro:per
you	that	pro:per	pro:dem
quite	warm	adv	adj
warm	be&3S	adj	cop
be&3S	not	cop	neg
not	it	neg	pro:per
phewwhee		on
have	you	v	pro:per
you	see&PASTP	pro:per	part
see&PASTP	this	part	pro:dem
this	book	pro:dem	n
book	here	n	adv
here	Fraser	adv	n:prop
what	be&3S	pro:int	cop
be&3S	this	cop	pro:dem
this	book	pro:dem	n
do&PAST	you	mod	pro:per
you	get	pro:per	v
get	this	v	pro:dem
this	for	pro:dem	prep
for	your	prep	det:poss
your	+n	det:poss	n
what	be&3S	pro:int	aux
be&3S	it	aux	pro:per
do	you	mod	pro:per
you	know	pro:per	v
do	you	mod	pro:per
you	want	pro:per	v
want	to	v	inf
to	look	inf	cop
look	at	cop	prep
at	this	prep	pro:dem
this	book	pro:dem	n
the	very	det:art	adv
very	small	adv	adj
do	you	mod	pro:per
you	want	pro:per	v
want	to	v	inf
to	look	inf	cop
look	at	cop	prep
at	this	prep	pro:dem
this	book	pro:dem	n
book	Fraser	n	n:prop
do	you	mod	pro:per
you	want	pro:per	v
want	to	v	inf
to	read&ZERO	inf	v
read&ZERO	this	v	pro:dem
this	book	pro:dem	n
come	on	v	adv
on	then	adv	adv:tem
do	you	mod	pro:per
you	want	pro:per	v
want	to	v	inf
to	sit	inf	v
sit	with	v	prep
with	Mummy	prep	n:prop
yes	do	co	v
do	you	v	pro:per
you	want	pro:per	v
want	to	v	inf
to	sit	inf	v
sit	with	v	prep
with	Mummy	prep	n:prop
be&PRES	you	cop	pro:per
you	too	pro:per	adv
too	busy	adv	adj
busy	building	adj	n
what	be&PRES	pro:int	aux
be&PRES	you	aux	pro:per
you	make-PRESP	pro:per	part
be&PRES	you	cop	pro:per
you	put-PRESP	pro:per	part
put-PRESP	all	part	qn
all	the	qn	det:art
the	same	det:art	adj
same	color-PL	adj	n
color-PL	on	n	prep
on	top	prep	n
top	of	n	prep
of	each	prep	qn
each	other	qn	qn
what	color	pro:int	n
color	s	n	poss
s	that	poss	pro:dem
yellow		n
yeah	that	co	pro:dem
that	be&3S	pro:dem	cop
be&3S	yellow	cop	adj
what	be&3S	pro:int	cop
be&3S	that	cop	pro:dem
red		adj
yes	that	co	pro:dem
that	be&3S	pro:dem	cop
be&3S	right	cop	n
where	do&3S	adv:int	mod
do&3S	that	mod	det:dem
that	go	det:dem	v
do&3S	it	mod	pro:per
it	go	pro:per	v
go	there	v	adv
yes		co
what	be&3S	pro:int	aux
be&3S	it	aux	pro:per
what	can	pro:int	mod
can	you	mod	pro:per
you	hear	pro:per	v
what	can	pro:int	mod
can	you	mod	pro:per
you	hear	pro:per	v
hear	Fraser	v	n:prop
what	be&PRES	pro:int	aux
be&PRES	you	aux	pro:per
you	listen-PRESP	pro:per	part
listen-PRESP	to	part	inf
Jwww		n:prop
not	Jwww	neg	n:prop
be&3S	it	aux	pro:per
it	Jwww	pro:per	n:prop
do	you	mod	pro:per
you	want	pro:per	v
want	to	v	inf
to	look	inf	cop
look	at	cop	prep
at	this	prep	pro:dem
this	book	pro:dem	n
book	Fraser	n	n:prop
come	look	v	cop
look	at	cop	prep
at	this	prep	pro:dem
this	book	pro:dem	n
with	Mummy	prep	n:prop
Fraser	look	n:prop	v
do	you	mod	pro:per
you	want	pro:per	v
want	to	v	inf
to	see	inf	v
see	this	v	pro:dem
this	book	pro:dem	n
call-PAST	the	v	det:art
the	very	det:art	adv
very	small	adv	adj
look		co
one	day	det:num	n
day	when	n	conj
when	Baby_bear	conj	n:prop
Baby_bear	be&PAST&13S	n:prop	aux
be&PAST&13S	play-PRESP	aux	part
play-PRESP	in	part	prep
in	the	prep	det:art
the	wood-PL	det:art	n
wood-PL	he	n	pro:sub
he	find&PAST	pro:sub	v
look	at	cop	prep
at	the	prep	det:art
the	bear	det:art	n
bear	Fraser	n	n:prop
look	at	cop	prep
at	the	prep	det:art
the	bear	det:art	n
here		adv
he	find&PAST	pro:sub	v
find&PAST	a	v	det:art
a	very	det:art	adv
very	small	adv	adj
small	oh	adj	co
oh	something	co	pro:indef
yeah		co
he	pick-PAST	pro:sub	v
pick-PAST	up	v	prep
up	the	prep	det:art
the	very	det:art	adv
very	small	adv	adj
small	something	adj	pro:indef
something	in	pro:indef	prep
in	his	prep	det:poss
his	paw-PL	det:poss	n
paw-PL	and	n	coord
and	give&PAST	coord	v
give&PAST	it	v	pro:per
it	a	pro:per	det:art
a	good	det:art	adj
good	sniff	adj	v
you	be&PRES	pro:per	aux
be&PRES	very	aux	adv
very	small	adv	adj
small	say&PAST	adj	v
say&PAST	giant	v	n
giant	Baby_bear	n	n:prop
I	be&1S	pro:sub	aux
be&1S	lose&PAST	aux	v
lose&PAST	cry-PAST	v	v
cry-PAST	the	v	det:art
the	very	det:art	adv
very	small	adv	adj
I	want	pro:sub	v
want	my	v	det:poss
my	Mummy	det:poss	n:prop
I	do	pro:sub	mod
do	not	mod	neg
not	know	neg	v
know	where	v	adv:int
where	your	adv:int	det:poss
your	Mummy	det:poss	n:prop
Mummy	be&3S	n:prop	aux
be&3S	say&PASTP	aux	part
say&PASTP	giant	part	adj
giant	Baby_bear	adj	n:prop
Baby_bear	but	n:prop	conj
but	you	conj	pro:per
you	can	pro:per	mod
can	share	mod	v
share	my	v	det:poss
my	Mummy	det:poss	n:prop
Mummy	if	n:prop	conj
if	you	conj	pro:per
you	like	pro:per	co
and	he	coord	pro:sub
he	take&PAST	pro:sub	v
take&PAST	the	v	det:art
the	very	det:art	adv
very	small	adv	adj
small	home	adj	n
home	to	n	prep
to	his	prep	det:poss
his	mother	det:poss	n
mother	and	n	coord
and	place-PAST	coord	v
place-PAST	him	v	pro:obj
him	in	pro:obj	prep
in	one	prep	det:num
one	of	det:num	prep
of	her	prep	pro:obj
her	very	pro:obj	adv
very	large	adv	adj
large	paw-PL	adj	n
his	mother	det:poss	n
mother	give&PAST	n	v
give&PAST	a	v	det:art
a	great	det:art	adj
great	big	adj	adj
big	grin	adj	n
grin	show-PRESP	n	part
show-PRESP	all	part	qn
all	of	qn	prep
of	her	prep	det:poss
her	great	det:poss	adj
great	big	adj	adj
big	tooth&PL	adj	n
what	be&3S	pro:int	cop
be&3S	this	cop	pro:dem
this	you	pro:dem	pro:per
you	have	pro:per	aux
have	find&PASTP	aux	part
find&PASTP	say&PAST	part	v
say&PAST	giant	v	n
giant	Mummybear	n	n:prop
I	want	pro:sub	v
want	my	v	det:poss
my	Daddy	det:poss	n:prop
Daddy	howl-PAST	n:prop	v
howl-PAST	the	v	det:art
the	very	det:art	adv
very	small	adv	adj
I	do	pro:sub	mod
do	not	mod	neg
not	know	neg	v
know	where	v	adv:int
where	your	adv:int	det:poss
your	Daddy	det:poss	n:prop
Daddy	be&3S	n:prop	aux
be&3S	say&PASTP	aux	part
say&PASTP	giant	part	adj
giant	Baby_bear	adj	n:prop
Baby_bear	but	n:prop	conj
but	you	conj	pro:per
you	can	pro:per	mod
can	share	mod	v
share	mine	v	n
mine	if	n	conj
if	you	conj	pro:per
you	like	pro:per	co
and	giant	coord	adj
giant	Baby_bear	adj	n:prop
Baby_bear	take&PAST	n:prop	v
take&PAST	the	v	det:art
the	very	det:art	adv
very	small	adv	adj
small	from	adj	prep
from	his	prep	det:poss
his	Mummy	det:poss	n:prop
Mummy	be&3S	n:prop	aux
be&3S	very	aux	adv
very	large	adv	adj
large	paw-PL	adj	n
paw-PL	and	n	coord
and	place-PAST	coord	v
place-PAST	him	v	pro:obj
him	in	pro:obj	prep
in	his	prep	det:poss
his	Daddy	det:poss	n:prop
Daddy	be&3S	n:prop	aux
be&3S	even	aux	adv
even	large-CP	adv	adj
large-CP	paw-PL	adj	n
giant	Daddybear	adj	n:prop
Daddybear	stare-PAST	n:prop	v
stare-PAST	hard	v	adv
hard	through	adv	prep
through	his	prep	det:poss
his	spectacle-PL	det:poss	n
what	be&3S	pro:int	cop
be&3S	this	cop	pro:dem
this	you	pro:dem	pro:per
you	have	pro:per	aux
have	found	aux	v
found	he	v	pro:sub
he	growl-PAST	pro:sub	v
I	want	pro:sub	v
want	to	v	inf
to	go	inf	v
go	home	v	n
home	wail-PAST	n	v
wail-PAST	the	v	det:art
the	very	det:art	adv
very	small	adv	adj
I	do	pro:sub	mod
do	not	mod	neg
not	know	neg	v
know	where	v	adv:int
where	your	adv:int	det:poss
your	home	det:poss	n
home	be&3S	n	aux
be&3S	say&PASTP	aux	part
say&PASTP	giant	part	adj
giant	Baby_bear	adj	n:prop
Baby_bear	but	n:prop	conj
but	you	conj	pro:per
you	can	pro:per	mod
can	share	mod	v
share	mine	v	n
mine	if	n	conj
if	you	conj	pro:per
you	like	pro:per	co
let&ZERO	me	v	pro:obj
me	show	pro:obj	v
show	you	v	pro:per
you	around	pro:per	adv
and	giant	coord	adj
giant	Baby_bear	adj	n:prop
Baby_bear	show-PAST	n:prop	v
show-PAST	the	v	det:art
the	very	det:art	adv
very	small	adv	adj
small	all	adj	adv
all	around	adv	prep
around	his	prep	det:poss
his	cave	det:poss	n
he	show-PAST	pro:sub	v
show-PAST	him	v	pro:obj
him	the	pro:obj	det:art
the	sleep-PRESP	det:art	part
sleep-PRESP	corner	part	n
corner	and	n	coord
and	the	coord	det:art
the	eat-PRESP	det:art	part
eat-PRESP	corner	part	n
corner	and	n	coord
and	the	coord	det:art
the	scratch-PRESP	det:art	part
scratch-PRESP	corner	part	n
corner	and	n	coord
and	the	coord	det:art
the	think-PRESP	det:art	part
think-PRESP	corner	part	n
and	last	coord	adv
last	of	adv	prep
of	all	prep	pro:indef
all	he	pro:indef	pro:sub
he	show-PAST	pro:sub	v
show-PAST	him	v	pro:obj
him	the	pro:obj	det:art
the	toy-PL	det:art	n
toy-PL	in	n	prep
in	the	prep	det:art
the	play-PRESP	det:art	part
play-PRESP	corner	part	n
there	you	adv	pro:per
you	be&PRES	pro:per	cop
be&PRES	say&PAST	cop	v
say&PAST	giant	v	n
giant	Baby_bear	n	n:prop
you	be&PRES	pro:per	cop
be&PRES	so	cop	co
so	very	co	adv
very	small	adv	adj
small	that	adj	pro:rel
that	I	pro:rel	pro:sub
I	shall	pro:sub	mod
shall	make	mod	v
make	a	v	det:art
a	very	det:art	adv
very	small	adv	adj
small	+n	adj	n
+n	for	n	prep
for	you	prep	pro:per
you	to	pro:per	inf
to	play	inf	v
play	in	v	adv
ugh	look	on	cop
look	at	cop	prep
at	those	prep	pro:dem
they	be&PRES	pro:sub	aux
be&PRES	yuck&dn-Y	aux	adj
yuck&dn-Y	be&PRES	adj	aux
be&PRES	not	aux	neg
not	they	neg	pro:sub
yeah		co
ugh		on
yuck		co
and	the	coord	det:art
the	very	det:art	adv
very	small	adv	adj
small	ride&PAST	adj	v
ride&PAST	on	v	prep
on	the	prep	det:art
the	very	det:art	adv
very	small	adv	adj
small	seesaw	adj	n
seesaw	with	n	prep
with	giant	prep	n
giant	Baby_bear	n	n:prop
Baby_bear	press-PRESP	n:prop	part
press-PRESP	one	part	det:num
one	end	det:num	n
end	with	n	prep
with	his	prep	det:poss
his	paw	det:poss	n
and	he	coord	pro:sub
he	swing&PASTP	pro:sub	part
swing&PASTP	on	part	prep
on	the	prep	det:art
the	very	det:art	adv
very	small	adv	adj
small	swing	adj	n
swing	with	n	prep
with	giant	prep	n
giant	Baby_bear	n	n:prop
Baby_bear	push-PRESP	n:prop	part
and	he	coord	pro:sub
he	slide&PAST	pro:sub	v
slide&PAST	on	v	prep
on	the	prep	det:art
the	very	det:art	adv
very	small	adv	adj
small	slide	adj	n
slide	with	n	prep
with	giant	prep	n
giant	Baby_bear	n	n:prop
Baby_bear	catch-PRESP	n:prop	part
catch-PRESP	him	part	pro:obj
him	in	pro:obj	prep
in	his	prep	det:poss
his	paw-PL	det:poss	n
then	sudden&dadj-LY	adv:tem	adv
sudden&dadj-LY	he	adv	pro:sub
he	feel&PAST	pro:sub	v
feel&PAST	very	v	adv
very	hungry	adv	adj
I	want	pro:sub	v
want	my	v	det:poss
my	dinner	det:poss	n
dinner	call-PAST	n	v
call-PAST	the	v	det:art
the	very	det:art	adv
very	small	adv	adj
I	do	pro:sub	mod
do	not	mod	neg
not	know	neg	v
know	what	v	pro:int
what	you	pro:int	pro:per
you	be&PAST	pro:per	aux
be&PAST	go-PRESP	aux	part
go-PRESP	to	part	inf
to	have	inf	v
have	for	v	prep
for	your	prep	det:poss
your	dinner	det:poss	n
dinner	say&PAST	n	v
say&PAST	giant	v	adj
giant	Baby_bear	adj	n:prop
Baby_bear	but	n:prop	conj
but	you	conj	pro:per
you	can	pro:per	mod
can	share	mod	v
share	mine	v	n
mine	if	n	conj
if	you	conj	pro:per
you	like	pro:per	co
and	giant	coord	adj
giant	Baby_bear	adj	n:prop
Baby_bear	place-PAST	n:prop	v
place-PAST	the	v	det:art
the	very	det:art	adv
very	small	adv	adj
small	next	adj	adv
next	to	adv	prep
to	his	prep	det:poss
his	plate	det:poss	n
and	the	coord	det:art
the	very	det:art	adv
very	small	adv	adj
small	eat&PAST	adj	v
eat&PAST	one	v	pro:indef
one	whole	pro:indef	adj
whole	pea	adj	n
pea	and	n	coord
and	five	coord	det:num
five	whole	det:num	n
whole	crumb-PL	n	n
crumb-PL	of	n	prep
of	bread	prep	n
and	he	coord	pro:sub
he	drink&PAST	pro:sub	v
drink&PAST	a	v	det:art
a	whole	det:art	n
whole	spoon-FUL	n	n
spoon-FUL	of	n	prep
of	milk	prep	n
and	then	coord	adv:tem
then	he	adv:tem	pro:sub
he	feel&PAST	pro:sub	v
feel&PAST	very	v	adv
very	tire-PASTP	adv	part
I	want	pro:sub	v
want	my	v	det:poss
my	bed	det:poss	n
bed	say&PAST	n	v
say&PAST	the	v	det:art
the	very	det:art	adv
very	small	adv	adj
I	want	pro:sub	v
want	my	v	det:poss
my	bed	det:poss	n
bed	too	n	post
too	say&PAST	post	v
say&PAST	giant	v	n
giant	Baby_bear	n	n:prop
but	first	conj	adv
first	of	adv	prep
of	all	prep	pro:indef
all	we	pro:indef	pro:sub
we	have	pro:sub	v
have	a	v	det:art
